# Supplementary material
Source: HighWire-hosted journal article supplement (https://erj.ersjournals.com/content/56/2/2000689)
Supplement: inline-supplementary-material-1 [file inline-supplementary-material-1.pdf]

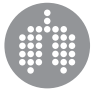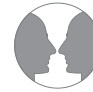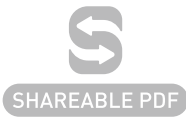

# Chronic air pollution and health burden in Dhaka city

Shafayet Ahmed Siddiqui<sup>1,2</sup>, Md Jakaria <sup>3</sup>, Mohammad Nurul Amin<sup>1</sup>,  
Abdullah Al Mahmud<sup>2</sup> and David Gozal <sup>4</sup>

**Affiliations:** <sup>1</sup>Dept of Pharmacy, Atish Dipankar University of Science and Technology, Dhaka, Bangladesh. <sup>2</sup>Dept of Pharmacy, Noakhali Science and Technology University, Noakhali, Bangladesh. <sup>3</sup>The Florey Institute of Neuroscience and Mental Health, The University of Melbourne, Parkville, Australia. <sup>4</sup>Dept of Child Health, University of Missouri, Columbia, MO, USA.

**Correspondence:** David Gozal, Comer Children's Hospital, The University of Chicago, Dept of Child Health, 400 N. Keene Street, Suite 010, Columbia, MO 65201, USA. E-mail: drdavidgozal@gmail.com

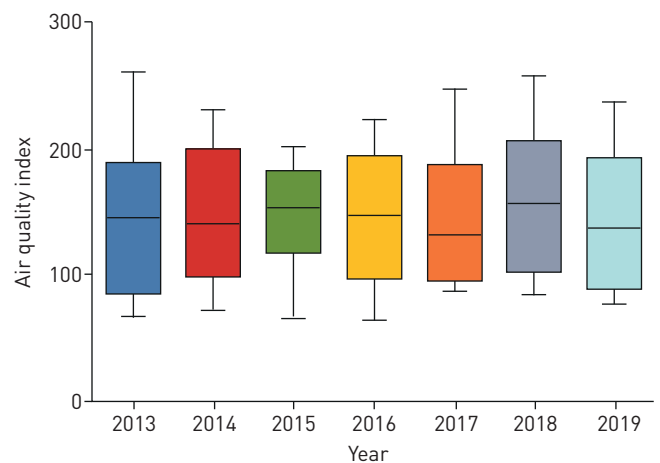

 @ERSpublications  
**Air pollution levels in developing countries such as Bangladesh with a relatively young population pose an inordinate health risk for many years to come unless significant environmental control measures are effectively undertaken** <https://bit.ly/3bvzesx>

**Cite this article as:** Siddiqui SA, Jakaria M, Amin MN, *et al.* Chronic air pollution and health burden in Dhaka city. *Eur Respir J* 2020; 56: 2000689 [<https://doi.org/10.1183/13993003.00689-2020>].

This single-page version can be shared freely online.

*To the Editor:*

Air quality is usually evaluated by the concentrations of particulate matter and gaseous substances that are present in the air we breathe. Thousands of pollutants are responsible for environmental air pollution, with particulate matter with a 50% cut-off aerodynamic diameter of 2.5  $\mu\text{m}$  (PM<sub>2.5</sub>), PM<sub>10</sub>, carbon monoxide, ozone, sulfur dioxide and NO<sub>x</sub> being those most frequently evaluated. In developing countries such as Bangladesh, awareness of air pollution is virtually non-existent and, most of the time, ignored even

when air quality becomes unbearable to most citizens. Among the sources of particulate matter in Dhaka, the large metropolis that serves as the capital city of Bangladesh, road dust, textile and dyeing businesses, tanneries, chemical and cement factories, and brick kilns emerge as the most polluting offenders. Substantial evidence has shown that  $PM_{2.5}$  is independently implicated in cardiovascular and respiratory diseases, and cancer, in light of its ability to reach terminal bronchioles and alveolar structures, and even reach the bloodstream [1].
